# Supplementary material for: Woodpecker drumming behavior is linked to the elevated expression of genes that encode calcium handling proteins in the neck musculature
Source: Oxford University Press journal article supplement (doi:10.1242/jeb.180190), 2018-01-01
Supplement: jeb180190supp.pdf [file jeb180190supp.pdf]

## Supplementary Tables

**Table S1.** PCR primers used for amplification of Parvalbumin (PV), fast SR calcium ATPase 1 (SERCA1), ryanodine receptor 1 (RYR1), and Glyceraldehyde 3-phosphate dehydrogenase (GAPDH). Amplified PCR products were sequenced and used to generate species-specific quantitative PCR primers (see Table S2).

| Gene of Interest | Species Designed From | Species Used For  | Forward Primer        | Reverse Primer        | Product Size (bp) |
|------------------|-----------------------|-------------------|-----------------------|-----------------------|-------------------|
| <i>PV</i>        | Downy woodpecker      | DW, RBW, and WBNH | ACCCAGATGGAAGAGACCT   | TGCAGGATTGCAGAGAACAG  | 253               |
| <i>SERCA1</i>    | Downy woodpecker      | DW                | GAGGGGGAAGTGTGAAGCA   | GACTGCAGGAACTCCACGAT  | 560               |
|                  | Downy woodpecker      | RBW               | AGCAGAAGTTGGACGAGTTTG | CCCGACCTTCTCATAGACTCC | 577               |
|                  | Zebra finch           | WBNH              | ACCACCAAACCAAGTCAAGC  | GGAGGAACTCGACGATCTTG  | 454               |
| <i>RYR1</i>      | American crow         | DW, RBW, and WBNH | AGCCCGACATGAAGTGTGAC  | TGATCCTCGTATTGCTTGCG  | 355               |
| <i>GAPDH</i>     | Downy woodpecker      | DW, RBW, and WBNH | AGCATCTACTGGGGCTGCTA  | CACCACACGGTTGCTGTATC  | 352               |

**Table S2.** Species-specific primers used for quantitative PCR.

| <b>Species</b>          | <b>Target</b> | <b>Forward primer</b> | <b>Reverse primer</b> | <b>Product size (bp)</b> |
|-------------------------|---------------|-----------------------|-----------------------|--------------------------|
| Downy woodpecker        | <i>PV</i>     | GCTGGAGATAAGGACGGTGA  | GAACAGGAGCCAAAGCAGTC  | 152                      |
|                         | <i>SERCA1</i> | GCAGAAGTTGGACGAGTTTG  | AAGTGGCCGATGTTGATGAG  | 88                       |
|                         | <i>RYR1</i>   | CTCCGTCTCGTCCTTGTTG   | GAGACCCACACGCTGGAG    | 81                       |
|                         | <i>GAPDH</i>  | TGAGCTCAATGGGAAACTCA  | TCAGCAGCAGCCTTCACTAC  | 135                      |
| Red-bellied woodpecker  | <i>PV</i>     | GCTGGAGATAAGGACGGTGA  | GAACAGGAGCCAAAGCAGTC  | 152                      |
|                         | <i>SERCA1</i> | CACATCAAGGCTGGCTCCTA  | ACGTCGGTGTGTAAGACGTT  | 176                      |
|                         | <i>RYR1</i>   | CTCCGTCTCGTCCTTGTTG   | GAGACCCACACGCTGGAG    | 81                       |
|                         | <i>GAPDH</i>  | TGAGCTCAATGGGAAACTCA  | TCAGCAGCAGCCTTCACTAC  | 135                      |
| White-breasted nuthatch | <i>PV</i>     | GCTGGAGATAAGGACGGTGA  | GAACAGGAGCCAAAGCAGTC  | 152                      |
|                         | <i>SERCA1</i> | CGGAAGGAGGTGATGGGC    | CCCTTGTTGTCCCCCGTGAT  | 80                       |
|                         | <i>RYR1</i>   | CTCCGTCTCGTCCTTGTTG   | GAGACCCACACGCTGGAG    | 81                       |
|                         | <i>GAPDH</i>  | TCCTGAGCTCAATGGGAAAC  | CTTGGCTGGTTTTTCCAGAC  | 101                      |

**Table S3** Test effect and variance for the random effect (individual identity) in each linear mixed model

| <b>Model</b> | <b>X<sup>2</sup>, p value</b>     | <b>Variance</b>                           | <b>Standard deviation</b>             |
|--------------|-----------------------------------|-------------------------------------------|---------------------------------------|
| PV           | X <sup>2</sup> (1)= 7.65, p=0.006 | Individual ID: 0.4083<br>Residual: 0.2665 | Individual ID: 0.64<br>Residual: 0.52 |
| SERCA1       | X <sup>2</sup> (1)= 0.87, p=0.35  | Individual ID: 0.1209<br>Residual: 0.3917 | Individual ID: 0.35<br>Residual: 0.63 |
| RYR1         | X <sup>2</sup> (1)= 7.06, p=0.008 | Individual ID: 0.6012<br>Residual: 0.4251 | Individual ID: 0.78<br>Residual: 0.65 |
